# Supplementary material
Source: MDPI journal article supplement (https://www.mdpi.com/1099-4300/23/5/559)
Supplement: s1 [file s1]

**Table S1.** Statistical trends significance of vegetation indices ((Normalised Difference Vegetation Index—NDVI, modified soil-adjusted vegetation index—MSAVI)) and climatic variables (TEMP: Temperature; PCP: Precipitation) during the study period in ZAV: Tornadizos de Ávila and ZMA: Soto del Real.

| Zone | Variable | Slope   | Standard Error | R <sup>2</sup> | t-estimated | t-value | Signif* |
|------|----------|---------|----------------|----------------|-------------|---------|---------|
| ZAV  | NDVI     | -0.0014 | 0.0013         | 0.0678         | 1.0446      | 2.1314  | n.s.    |
|      | MSAVI    | -0.001  | 0.0011         | 0.0573         | 0.9552      | 2.1314  | n.s.    |
|      | TEMP     | 0.0384  | 0.0262         | 0.1254         | 1.4665      | 2.1314  | n.s.    |
|      | PCP      | -2.613  | 4.2582         | 0.0245         | 0.6137      | 2.1314  | n.s.    |
| ZMA  | NDVI     | 0.0001  | 0.0019         | 0.0002         | 0.0529      | 2.1314  | n.s.    |
|      | MSAVI    | -0.0003 | 0.0015         | 0.0032         | 0.2186      | 2.1314  | n.s.    |
|      | TEMP     | 0.0563  | 0.0277         | 0.2158         | 2.0318      | 2.1314  | n.s.    |
|      | PCP      | -5.7312 | 7.7954         | 0.0348         | 0.7352      | 2.1314  | n.s.    |

Note: \*Significance at 95% level of confidence: s, significant; n.s., no significant

**Table S2.** Chow's test of annual pasture phases. ZAV: Tornadizos de Ávila, ZMA: Soto Del Real. REG\_1 (linear regression of the first phase data), REG\_2 (linear regression of the second phase data, REG\_T (both data regression.) B<sub>0</sub> is the intercept, and B<sub>1</sub> is the slope of the linear regression.

|     |        |        | P1-P2   | P2-P3     | P3-P4     | P4-P5     | P5-P1    |
|-----|--------|--------|---------|-----------|-----------|-----------|----------|
| ZAV | REG_1  | B0     | 0.507** | 0.416**   | 1.088**   | 0.372**   | -0.861** |
|     |        | B1     | -0.003* | 0.013**   | -0.029**  | -0.002*   | 0.034**  |
|     | REG_2  | B0     | 0.414** | 1.088**   | 0.372**   | -0.832**  | 0.507**  |
|     |        | B1     | 0.013** | -0.029**  | -0.002*   | 0.033**   | -0.003*  |
|     | REG_T  | B0     | 0.502** | 0.606**   | 0.906**   | -0.158**  | 0.047 *  |
|     |        | B1     | 0.004** | -0.006**  | -0.020**  | 0.015**   | 0.010**  |
|     | T-Chow | F-chow | 25.178* | 197.0213* | 51.74677* | 56.88499* | 38.264*  |
|     |        | F-test | 3.024   | 3.020119  | 3.024042  | 3.031773  | 3.032    |
|     | ZMA    | REG_1  | B0      | 0.580**   | 0.523**   | 1.298**   | 0.302**  |
|     |        |        | B1      | 0.001*    | 0.010**   | -0.040**  | -0.001*  |
|     |        | REG_2  | B0      | 0.524**   | 1.298**   | 0.302**   | -1.393** |
|     |        |        | B1      | 0.009**   | -0.040**  | -0.001*   | 0.049**  |
|     |        | REG_T  | B0      | 0.576**   | 0.762**   | 0.947**   | -0.451** |
|     |        |        | B1      | 0.004**   | -0.014**  | -0.022**  | 0.024**  |
|     | T-Chow | F-chow | 6.189*  | 174.1243* | 83.0957*  | 60.80033* | 40.837** |
|     |        | F-test | 3.024   | 3.020119  | 3.024042  | 3.031773  | 3.032    |

Note: \*represents P < 0.05 significance, \*\*represents P < 0.01 significance.

(a)

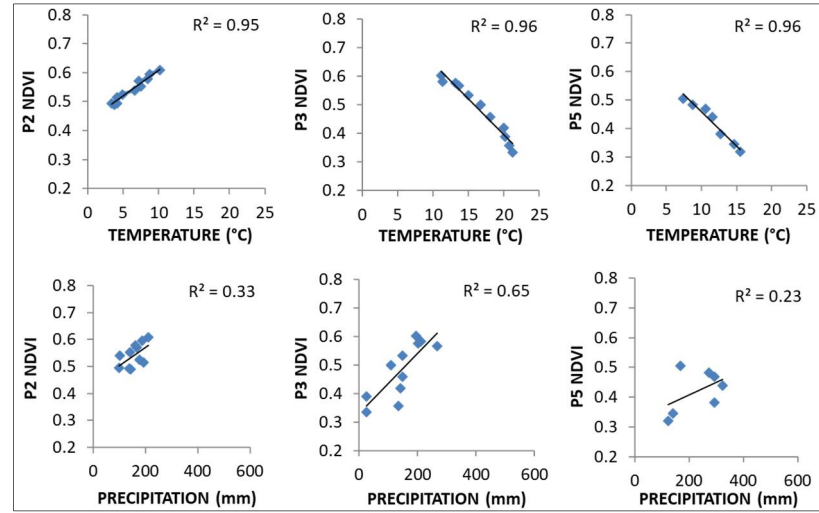

(b)

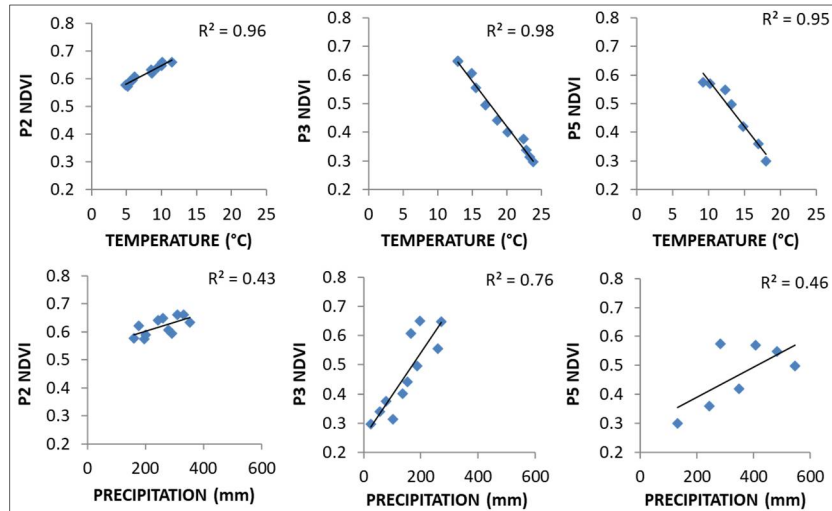

**Figure S1.** Growing phases response of NDVI to water (Accumulated precipitation) and energy (Average temperature) parameters at 8 days in Tornadizos de Ávila (ZAV) **(a)** and Soto del Real (ZMA) **(b)**. In each figure, the regression equation was obtained from the Least Squares method.

**Table S3.** Time-series Pearson correlation coefficients (CR) and partial correlation coefficients (PCR) between NDVI time-series and meteorological time-series for each study zone (ZAV: Tornadizos de Ávila; ZMA: Soto del Real) during the period of 2002-2018. TEMP is 8-day average air temperature (°C), and PCP is the accumulated precipitation in 8-day (mm).

| Zone | CR       |         | PCR      |         |
|------|----------|---------|----------|---------|
|      | TEMP     | PCP     | TEMP     | PCP     |
| ZAV  | -0.587** | 0.192** | -0.487** | 0.168** |
| ZMA  | -0.743** | 0.270** | -0.523** | 0.104** |

Note: \*\*represents  $P < 0.01$  significance

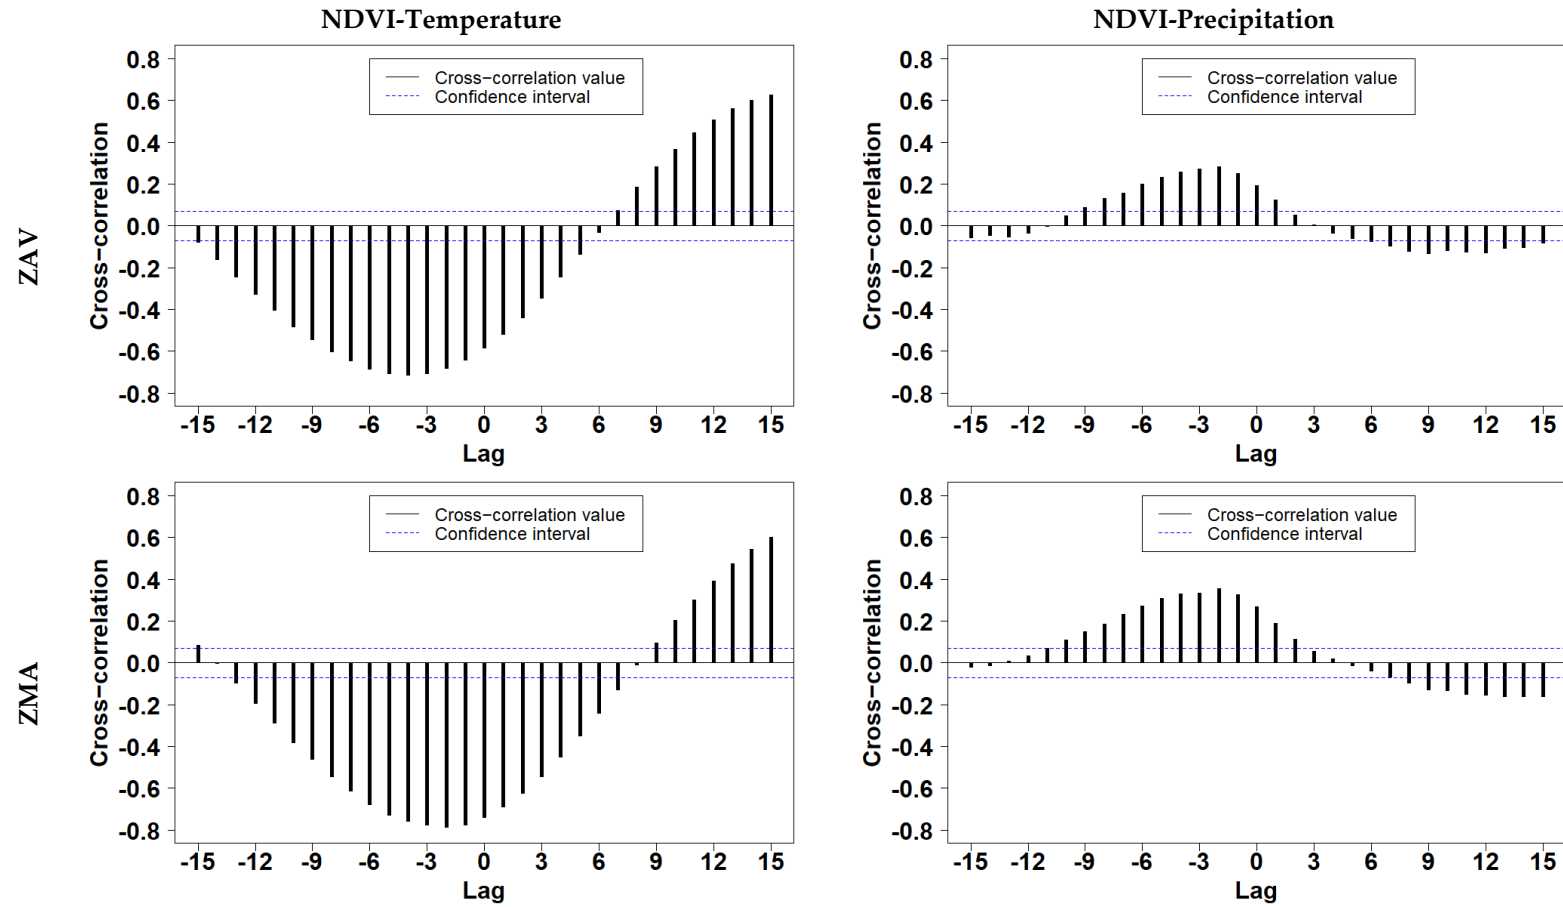

**Figure S2.** Time series cross-correlation between NDVI and climatic variables time series (Temperature and Accumulated precipitation) in Tornadizos de Ávila (ZAV) and Soto del Real (ZMA). Each lag is of an 8-days period. The blue dot line is the confidence interval at 95%.

**Table S4.** Pearson correlation coefficients (CR) and partial correlation coefficients (PCR) between NDVI and meteorological parameters in five distinct phases. TEMP is 8-day average air temperature (°C), and PCP is the accumulated precipitation in 8-day (mm). ZAV is Tornadizos de Ávila, and ZMA is Soto del Real.

|     |       | CR          |            | PCR         |            |
|-----|-------|-------------|------------|-------------|------------|
|     | PHASE | NDVI x TEMP | NDVI x PCP | NDVI x TEMP | NDVI x PCP |
| ZAV | P1    | 0.203*      | 0.029      | 0.238**     | -0.014     |
|     | P2    | 0.524**     | 0.050      | 0.082       | 0.157*     |
|     | P3    | -0.740**    | 0.297**    | -0.066      | -0.010     |
|     | P4    | 0.081       | 0.109      | -0.039      | 0.150      |
|     | P5    | -0.578**    | 0.265**    | 0.092       | -0.010     |
| ZMA | P1    | 0.040       | 0.130      | 0.133       | 0.105      |
|     | P2    | 0.353**     | 0.099      | 0.134       | 0.180*     |
|     | P3    | -0.786**    | 0.402**    | 0.044       | -0.009     |
|     | P4    | -0.019      | 0.194*     | 0.019       | 0.194*     |
|     | P5    | -0.654**    | 0.224*     | 0.077       | -0.126     |

Note: \*represents  $P < 0.05$  significance, \*\*represents  $P < 0.01$  significance.

**Table S5.** Cross-correlation coefficients between NDVI and meteorological parameters with different lags ( $\ell$ ) in different phases. ZAV: Tornadizos de Ávila and ZMA: Soto del Real. TEMP is 8-day average air temperature (°C), and PCP is the accumulated precipitation in 8-day (mm). Each time lag is of 8 days. The bold letter represents the maximum correlation in each row.

|     |       | time lag ( $\ell$ ) |               |        |               |        |        |               |        |
|-----|-------|---------------------|---------------|--------|---------------|--------|--------|---------------|--------|
|     | Phase | Param.              | 0             | 1      | 2             | 3      | 4      | 5             | 6      |
| ZAV | P2    | TEMP                | <b>0.526</b>  | 0.483  | 0.456         | 0.314  | 0.239  | 0.161         | 0.026  |
|     |       | PCP                 | 0.049         | 0.051  | <b>0.116</b>  | 0.108  | 0.053  | 0.052         | 0.078  |
|     | P3    | TEMP                | -0.740        | -0.762 | <b>-0.773</b> | -0.756 | -0.730 | -0.700        | -0.659 |
|     |       | PCP                 | 0.297         | 0.347  | <b>0.401</b>  | 0.274  | 0.269  | 0.186         | 0.067  |
|     | P5    | TEMP                | -0.578        | -0.592 | -0.607        | -0.616 | -0.632 | <b>-0.635</b> | -0.567 |
|     |       | PCP                 | 0.265         | 0.397  | <b>0.451</b>  | 0.415  | 0.249  | 0.238         | 0.201  |
| ZMA | P2    | TEMP                | <b>0.345</b>  | 0.217  | 0.192         | 0.174  | 0.133  | 0.064         | -0.019 |
|     |       | PCP                 | 0.096         | 0.171  | <b>0.204</b>  | 0.198  | 0.165  | 0.182         | 0.148  |
|     | P3    | TEMP                | <b>-0.786</b> | -0.784 | -0.753        | -0.729 | -0.715 | -0.709        | -0.647 |
|     |       | PCP                 | 0.402         | 0.423  | <b>0.433</b>  | 0.369  | 0.375  | 0.329         | 0.225  |
|     | P5    | TEMP                | <b>-0.654</b> | -0.650 | -0.650        | -0.620 | -0.645 | -0.618        | -0.523 |
|     |       | PCP                 | 0.224         | 0.336  | <b>0.437</b>  | 0.375  | 0.304  | 0.270         | 0.249  |



**Table S6.** Recurrence plot (RP) and Cross Recurrence plots (CRP) parameters and Recurrence Quantification Analysis (RQA) using general z-score vegetation indices series in ZAV: Tornadizos de Ávila and ZMA: Soto del Real. NDVI: Normalized Difference Vegetation Index,  $m$ : Embedding dimension,  $\tau$ : Delay,  $r$ : threshold, RR: Recurrence rate, DET: Determinism, LT: Average length of diagonal structures, ENTR: Shannon Entropy, LAM: Laminarity, TT: Trapping time.

| Zone | RPs and CRPs | $m$ | $\tau$ | $r$   | RR (%) | DET (%) | LT   | ENTR | LAM (%) | TT   |
|------|--------------|-----|--------|-------|--------|---------|------|------|---------|------|
| ZAV  | NDVI         | 2   | 8      | 8.67  | 5.00   | 59.19   | 2.81 | 1.23 | 72.32   | 3.01 |
|      | TEMP         | 2   | 11     | 8.76  | 4.99   | 40.26   | 2.31 | 0.72 | 52.89   | 2.49 |
|      | PCP          | 2   | 3      | 1.35  | 4.97   | 14.65   | 2.10 | 0.32 | 33.72   | 2.35 |
|      | NDVI-TEMP    | 2   | 11     | 9.96  | 5.00   | 48.99   | 2.44 | 0.88 | 58.30   | 2.60 |
|      | NDVI-PCP     | 2   | 8      | 6.34  | 4.99   | 25.96   | 2.26 | 0.64 | 30.46   | 2.45 |
| ZMA  | NDVI         | 2   | 10     | 7.80  | 4.99   | 63.92   | 2.99 | 1.29 | 77.22   | 3.26 |
|      | TEMP         | 2   | 11     | 9.00  | 4.99   | 42.02   | 2.35 | 0.76 | 54.35   | 2.60 |
|      | PCP          | 10  | 9      | 13.25 | 5.00   | 6.57    | 2.03 | 0.14 | 20.72   | 2.11 |
|      | NDVI-TEMP    | 2   | 11     | 10.53 | 4.99   | 52.42   | 2.51 | 0.96 | 59.65   | 2.63 |
|      | NDVI-PCP     | 10  | 10     | 26.19 | 4.99   | 24.26   | 2.12 | 0.39 | 27.36   | 2.15 |

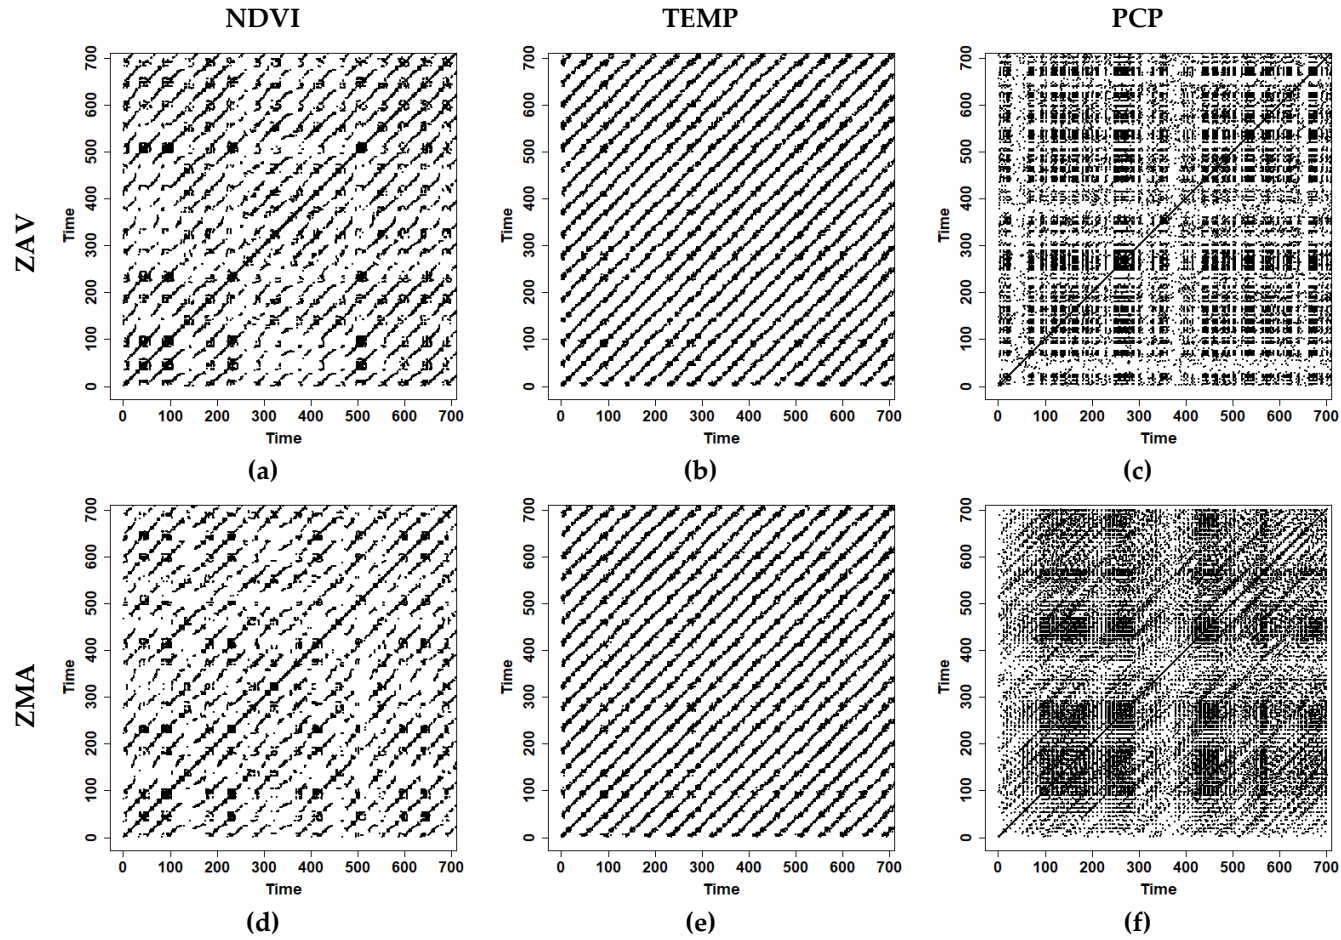

**Figure S3.** Optimized recurrence plots (RP) using NDVI, Average temperature (TEMP) and Accumulated precipitation (PCP) data and rescaled distance matrix for Tornadizos de Ávila (ZAV) and Soto del Real (ZMA). Time units are represented as the X and Y-axis. Each time-unit is 8-days, coincident with 8-day composed MODIS images during the study period (2002-2018). Panels [a-c] correspond respectively to RP of NDVI, Temperature and Accumulated Precipitation for the ZAV zone. Panels [d-f] correspond respectively to NDVI, Temperature and Accumulated precipitation for the ZMA zone.

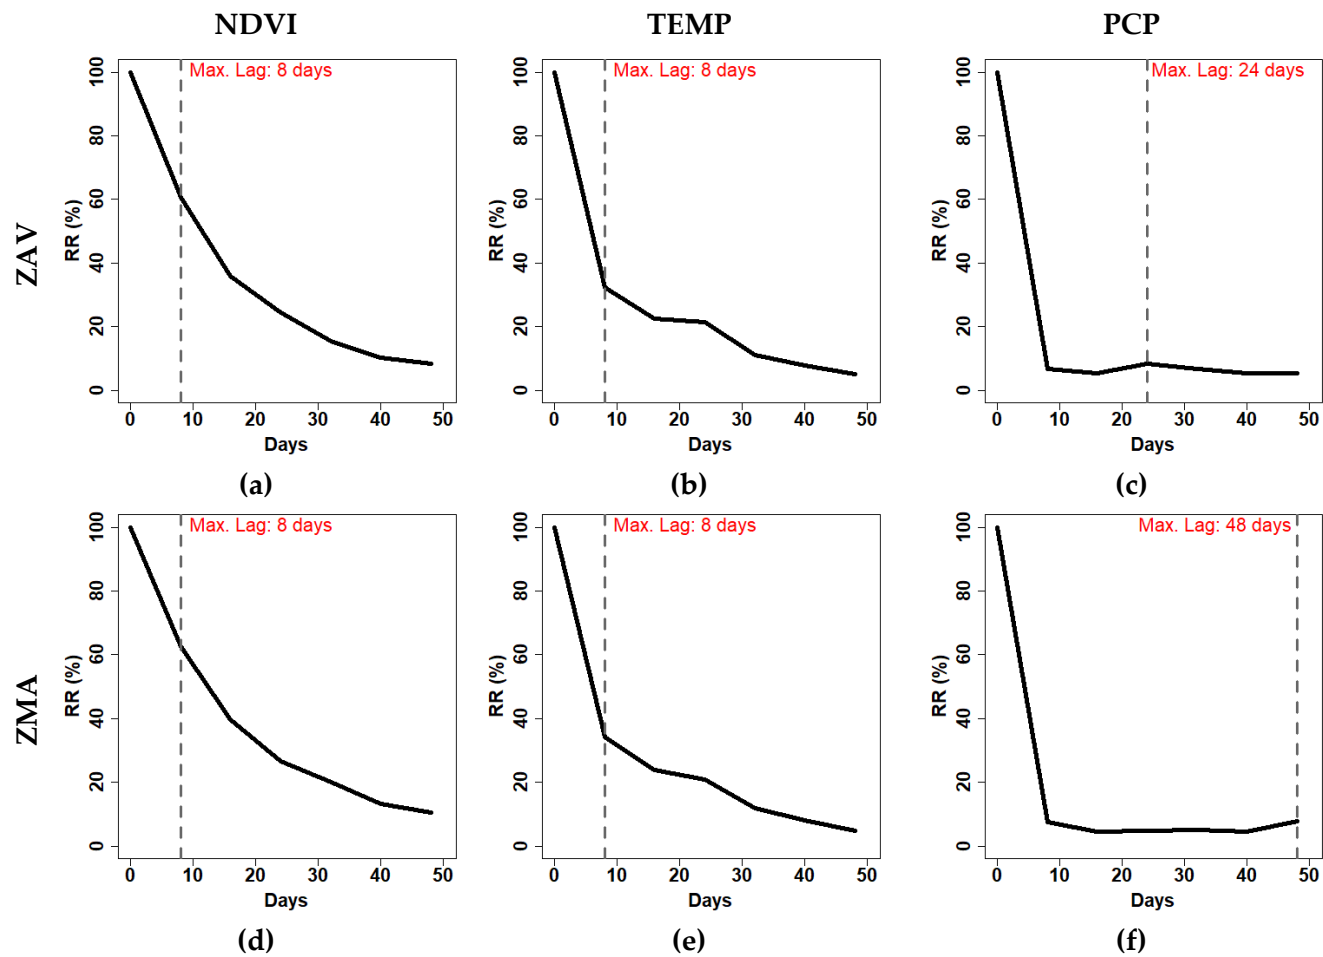

**Figure S4.** Diagonal-wise recurrence profile of the RPs obtained from the NDVI, Average temperature (TEMP) and accumulated precipitation (PCP) in Tornadizos de Ávila (ZAV) [a-c] and Soto del Real (ZMA) [d-f].

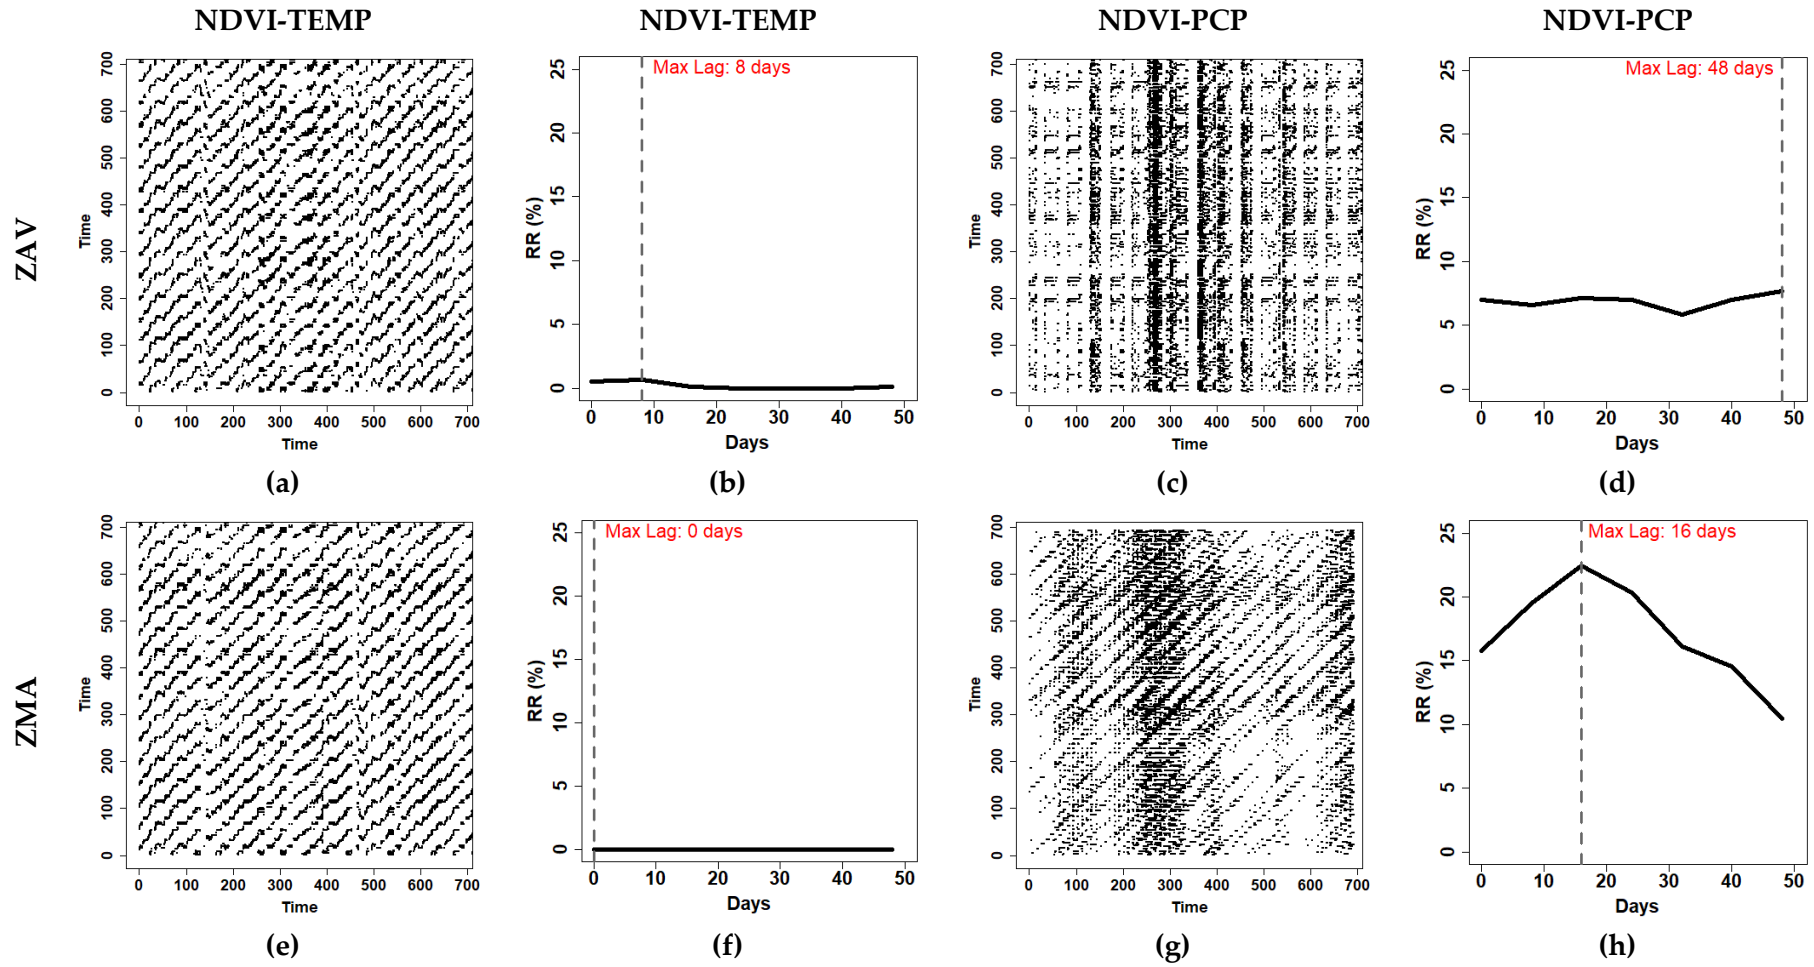

**Figure S5.** Optimized Cross-Recurrence Plots (CRPs) and diagonal-wise recurrence profiles between vegetation indices data (NDVI) temperature data (TEMP) and accumulated precipitation data (PCP) for Tornadizos de Ávila (ZAV) and Soto del Real (ZMA). Time units are represented as the X and Y-axis. Each time-unit is 8-days, coincident with 8-day composed MODIS images during the study period (2002-2018) in the CRPS. Lags are represented in days in the diagonal-wise recurrence profile. The panels [a,c,e,g] represent the CRPs of NDVI-TEMP and NDVI-PCP. The panels [b,d,f,h] represent the diagonal-wise profile of the CRPS, respectively.
